# Supplementary material for: Potential miRNA Use as a Biomarker: From Breast Cancer Diagnosis to Metastasis
Source: MDPI journal article supplement (doi:10.3390/cells12040525), 2023-02-06
Supplement: s1 [file s1]

**Table S1.** Impact of microRNAs on cancer-derived metastatic phenotype [34,58–83,95,97,98,100].

| miRNA                                                         | Study type             | Samples number                                                                                  | Samples type  | Samples sources                                                                     | Detection methodology | AUC           | Sensitivity     | Specificity    | Potential as              | Reference                      |
|---------------------------------------------------------------|------------------------|-------------------------------------------------------------------------------------------------|---------------|-------------------------------------------------------------------------------------|-----------------------|---------------|-----------------|----------------|---------------------------|--------------------------------|
| Let-7b-5p, miR-122-5p, miR-146b-5p, miR-210-3p and miR-215-5p | Multi-phase validation | 289 BC samples and 257 normal controls                                                          | Blood samples | Hospital of Nanjing Medical University.                                             | exiqon miRNA qPCR     | 0.843         | 81.1%           | NR             | Diagnosis                 | Li et al. [58]                 |
| miR-9 and miR-34a                                             | Case-Control           | 31 tumour tissues, 31 adjacent non-tumour and 20 healthy controls                               | Tissues       | National Tumor Bank and Isfahan Cancer Research Center of Seyed-o-Shohada Hospital. | qRT-PCR               | 0.71 and 0.72 | 83.33% and 72%. | 70.37% and 76% | Diagnosis                 | Orange and Motovali-Bashi [59] |
| miR-373                                                       | Case-Control           | 196 newly diagnosed BC patients, 76 patients with benign breast lesions, and 49 healthy control | Blood samples | National research center.                                                           | RT-qPCR               | 0.98          | 90.8%           | 98.4%          | Diagnostic and prognostic | Bakr et al. [60]               |

|                                                                                          |                                  |                                                                          |                          |                                                                          |                                  |       |        |        |                         |                      |
|------------------------------------------------------------------------------------------|----------------------------------|--------------------------------------------------------------------------|--------------------------|--------------------------------------------------------------------------|----------------------------------|-------|--------|--------|-------------------------|----------------------|
| miR-185-5p and miR-362-5p                                                                | Case-Control                     | 68 BC patients and 13 controls                                           | Blood samples            | Qilu Hospital of Shandong University.                                    | RT-qPCR                          | 0.957 | 92.65% | 92.31% | Diagnosis               | Zhang et al. [61]    |
| miR-145                                                                                  | Meta-Analysis                    | 8 reports ( 800 BC samples, 656 paracancerous and normal breast samples) | Tissues                  | NR                                                                       | qRT-PCR                          | NR    | NR     | NR     | Diagnosis               | Lv. et al. [34]      |
| miR-126-5p, miR-144-5p, miR-144-3p, miR-301a-3p, miR-126-3p, miR-101-3p, and miR-664b-5p | Clinical trial                   | 21 patients with TNBC diagnosis and 21 healthy.                          | Blood samples            | Medical Faculty of the Friedrich-Alexander University Erlangen-Nürnberg. | RT-qPCR                          | 0.814 | 83.8%  | 74.2%  | Diagnosis               | Kahraman et al. [62] |
| miR-1246 and miR-21                                                                      | <i>in vitro</i> and Case-Control | 16 BC samples and 16 healthy samples                                     | Exosomes from plasma     | USA                                                                      | Small RNA sequencing and qRT-PCR | 0.73  | NR     | NR     | Diagnosis               | Hannafon et al. [63] |
| miR-1246 and miR-21                                                                      | Meta-Analysis                    | 11 reports                                                               | peripheral blood samples | NR                                                                       | ELISA and qRT-PCR                | NR    | NR     | NR     | Diagnosis and prognosis | Wang et al. [64]     |

|                                                                                                                                               |                                    |                                                                             |                      |                                                                          |                                                                          |                   |        |        |                      |                  |
|-----------------------------------------------------------------------------------------------------------------------------------------------|------------------------------------|-----------------------------------------------------------------------------|----------------------|--------------------------------------------------------------------------|--------------------------------------------------------------------------|-------------------|--------|--------|----------------------|------------------|
| miR-21 and miR-27a                                                                                                                            | Case-Control                       | 129 BC patients and 50 patients with benign breast lesions as control group | Fasting venous blood | Jinan People's Hospital Affiliated to Shandong First Medical University. | fqPCR                                                                    | 0.737 and 0.771,  | 90.62% | 74.00  | Diagnosis            | Li et al. [65]   |
| Let-7b-5p, miR-106a-5p, miR-19a-3p, miR-19b-3p, miR-20a-5p, miR-223-3p, miR-25-3p, miR-425-5p, miR-451a, miR-92a-3p, miR-93-5p, and miR-16-5p | Four phase validation study        | 216 BC patients samples and 214 normal control samples                      | Blood samples        | Jiangsu Provincial People Hospital.                                      | exiqon miRNA qPCR validated by qRT-PCR                                   | 0.941             | 0.872  | 0.893  | Diagnosis            | Zou et al. [66]  |
| miR-9-5p, miR-34b-3p, miR-1-3p, miR-146a-5p, miR-20a-5p, miR-34a-5p, miR-125b-5p                                                              | Cohort                             | 135 Invasive Ductal Carcinoma patients and 125 healthy controls             | Blood samples        | Shenzhen Hospital, Peking University.                                    | qRT-PCR                                                                  | 0.880             | 81.25% | 86.25% | Diagnosis            | Chen et al. [67] |
| Bone metastasis                                                                                                                               |                                    |                                                                             |                      |                                                                          |                                                                          |                   |        |        |                      |                  |
| miR-21                                                                                                                                        | <i>in vitro</i> and <i>in vivo</i> | 8 mice per group                                                            | Bone tissues         | NR                                                                       | RNA-seq. qRT-PCR, western blot, confocal microscopy, and RNA interfering | Non reported (NR) | NR     | NR     | Promoting metastasis | Yuan et al. [95] |

|                                 |                                       |                                                    |                                                                                                                                |                                                                                                                          |            |       |       |       |                                                                 |                                    |
|---------------------------------|---------------------------------------|----------------------------------------------------|--------------------------------------------------------------------------------------------------------------------------------|--------------------------------------------------------------------------------------------------------------------------|------------|-------|-------|-------|-----------------------------------------------------------------|------------------------------------|
| miR-19a                         | <i>in vitro</i> and<br><i>in vivo</i> | NR                                                 | BC tissue from<br>bone-metastatic<br>lesions and pri<br>mary BC tissue                                                         | NR                                                                                                                       | Taqman PCR | NR    | NR    | NR    | Promoting<br>metastasis                                         | Wu et al.<br>[68]                  |
| miR-20a-5p                      | <i>in vitro</i>                       | NR                                                 | MCF-7 and<br>MDA-MB-231<br>cell lines                                                                                          | NR                                                                                                                       | qRT-PCR    | NR    | NR    | NR    | Promoting<br>migration and<br>invasion                          | Guo et al.<br>[69]                 |
| miR-16, miR-133a<br>and miR-223 | <i>in vitro</i> and<br><i>in vivo</i> | NR                                                 | MDA-MB-231<br>cell line, bone<br>and tibia<br>samples                                                                          | NR                                                                                                                       | RT-qPCR    | NR    | NR    | NR    | Promoted<br>osteoclast<br>activities and<br>bone<br>destruction | Kitayama<br>et al. [70]            |
| miR-143                         | <i>in vitro</i>                       | 15 patients                                        | BC tissue,<br>normal adjacent<br>tissues, MDA-<br>MB-231, MDA-<br>MB-436, SK-BR3,<br>CAMA-1 and<br>normal MB 157<br>cell lines | Fudan University<br>Shanghai Cancer<br>Center.                                                                           | qRT-PCR    | NR    | NR    | NR    | Tumour<br>suppressor                                            | Du et al.<br>[71]                  |
| miR-30b-5p                      | cohorts                               | 20 localized<br>tumours and 25<br>advanced disease | Liquid biopsies                                                                                                                | Breast Cancer Clinic<br>and Laboratory<br>Medicine<br>Department of the<br>Portuguese<br>Oncology Institute<br>of Porto. | qRT-PCR    | 0.831 | 88.9% | 66.7% | Progression<br>biomarker                                        | Estevão-<br>Pereira et<br>al. [72] |

| Lung metastasis                                                               |                                            |                                                                                                     |                        |                                                      |                             |       |    |    |                                              |                   |  |
|-------------------------------------------------------------------------------|--------------------------------------------|-----------------------------------------------------------------------------------------------------|------------------------|------------------------------------------------------|-----------------------------|-------|----|----|----------------------------------------------|-------------------|--|
| miR-663, miR-210, miR-1, miR-301a, miR-135b, miR-451, miR-30a and miR-199a-5p | <i>in silico</i>                           | 439 samples                                                                                         | Clinical data          | NR                                                   | METABRIC and TCGA databases | 0.774 | NR | NR | Metastasis to lung                           | Zhang et al. [97] |  |
| Let-7s family                                                                 | Cohort, <i>in vitro</i> and <i>in vivo</i> | Cohort I) 30 cases<br>Cohort II) 140 cases<br>Cohort III) 145 cases                                 | Tumour tissues         | Shanghai Institute of Nutrition and Health Sciences. | qRT-PCR                     | NR    | NR | NR | Poor prognosis and lung metastasis           | Qi et al. [98]    |  |
| miR-138-5p                                                                    | <i>in vitro</i> and <i>in vivo</i>         | NR                                                                                                  | Lung tissues           | Chinese PLA General Hospital.                        | RT-qPCR                     | NR    | NR | NR | Promotion of lung metastasis and progression | Xun et al. [73]   |  |
| miR-934                                                                       | case-control and <i>in vitro</i>           | 50 pairs of frozen BC tissue, adjacent normal tissue and 21 lymph node metastasis BC tissue samples | Lung metastatic tissue | Huai'an Maternity and Child Health Care Hospital.    | qPCR                        | NR    | NR | NR | Prognosis biomarker                          | Lu et al. [74]    |  |

|                          |                                       |                                                                                      |                                                                                        |                                                                                         |            |                                    |                    |                      |                                                                                 |                          |
|--------------------------|---------------------------------------|--------------------------------------------------------------------------------------|----------------------------------------------------------------------------------------|-----------------------------------------------------------------------------------------|------------|------------------------------------|--------------------|----------------------|---------------------------------------------------------------------------------|--------------------------|
| miR-4731                 | <i>in vitro</i> and<br><i>in vivo</i> | 50 patients                                                                          | Tumour tissue,<br>MDA-MB-436,<br>MDA-MB-453,<br>MCF-7, and<br>MDA-MB-231<br>cell lines | Chongqing<br>University Central<br>Hospital.                                            | RT-qPCR    | NR                                 | NR                 | NR                   | Inhibition of<br>EMT transition                                                 | Lang et al.<br>[75]      |
| miR-18a                  | <i>in vitro</i> and<br><i>in vivo</i> | NR                                                                                   | Primary tumour<br>and lung tissues                                                     | NR                                                                                      | qPCR       | NR                                 | NR                 | NR                   | Promotion of<br>metastasis                                                      | Krutilina<br>et al. [76] |
| Brain metastasis         |                                       |                                                                                      |                                                                                        |                                                                                         |            |                                    |                    |                      |                                                                                 |                          |
| miR-4428 and<br>miR-4480 | Case-<br>Control                      | 51 samples brain<br>metastasis and 28<br>samples without<br>brain metastasis         | Serum                                                                                  | National Cancer<br>Center Hospital.<br>Japan.                                           | Microarray | 0.779 and<br>0.781<br>respectively | 82.4% and<br>76.5% | f 64.3%<br>and 71.4% | Prediction of<br>brain<br>metastasis                                            | Sato et al.<br>[77]      |
| miR-10b                  | Retrospectiv<br>e Case-<br>Control    | 20 samples with<br>brain metastasis<br>and 10 samples<br>without brain<br>metastasis | Tumour tissues<br>block                                                                | Department of<br>Pathology,<br>Karmanos Cancer<br>Institute, Wayne<br>State University. | qRT-PCR    | NR                                 | NR                 | NR                   | Biomarker to<br>brain<br>metastasis and<br>a potential<br>therapeutic<br>target | Ahmad et<br>al. [78]     |
| miR-211                  | <i>in vitro</i> and<br><i>in vivo</i> | NR                                                                                   | Brain tissues                                                                          | NR                                                                                      | qRT-PCR    | 0.932                              | NR                 | NR                   | Brain<br>metastasis<br>predictor                                                | Pan et al.<br>[100]      |

|                           |                                    |                                                                                                                                                                                                                                    |                                              |                              |                                 |    |    |    |                                                      |                    |
|---------------------------|------------------------------------|------------------------------------------------------------------------------------------------------------------------------------------------------------------------------------------------------------------------------------|----------------------------------------------|------------------------------|---------------------------------|----|----|----|------------------------------------------------------|--------------------|
| miR-26b-5p and miR-101-3p | Pre-Clinical                       | NR                                                                                                                                                                                                                                 | Brain metastatic tumours and primary tumours | NR                           | RT-qPCR                         | NR | NR | NR | Prognostic and therapeutic                           | Harati et al. [79] |
| miR-125a                  | Cohort                             | Cohort I) 13 pairs of BC and adjacent normal breast tissues<br>Cohort II) 6 BC brain metastasis (BCBM) tissues<br>Cohort III) 20 BC and 20 BCBM patients' plasma samples, and Cohort IV) 53 BCBM patients' primary tumour tissues. | Tissues and plasma                           | Liaocheng People's Hospital. | RT-qPCR                         | NR | NR | NR | Therapeutic target                                   | Fu et al. [80]     |
| MN-anti-miR10b            | <i>in vitro</i> and <i>in vivo</i> | NR                                                                                                                                                                                                                                 | NR                                           | NR                           | Bioluminescence and Microscopy  | NR | NR | NR | Treatment in brain metastasis                        | Yoo et al. [81]    |
| miR-141                   | <i>in vitro</i> and <i>in vivo</i> | 10-15 mice per group                                                                                                                                                                                                               | Brain metastases tissues                     | NR                           | RT-PCR and fluorescence methods | NR | NR | NR | Biomarker and therapeutic target of brain metastasis | Debeb et al. [82]  |

|        |                                       |    |                                                                    |    |         |    |    |    |                          |                        |
|--------|---------------------------------------|----|--------------------------------------------------------------------|----|---------|----|----|----|--------------------------|------------------------|
| miR-93 | <i>in vitro</i> and<br><i>in vivo</i> | NR | Liver tissue,<br>MDA-MB-231,<br>T-47D, MCF7<br>and HEK293<br>cells | NR | RT-qPCR | NR | NR | NR | Metastasis<br>suppressor | Shibuya et<br>al. [83] |
|--------|---------------------------------------|----|--------------------------------------------------------------------|----|---------|----|----|----|--------------------------|------------------------|

NR= Information non reported in the article.
